# Supplementary material for: Intra-Tumoral Angiogenesis Is Associated with Inflammation, Immune Reaction and Metastatic Recurrence in Breast Cancer
Source: MDPI journal article supplement (doi:10.3390/ijms21186708), 2020-09-13
Supplement: s1 [file s1]

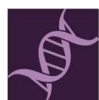

# Supplemental Materials

Masanori Oshi <sup>1,2</sup>, Stephanie Newman<sup>1,3</sup>, Yoshihisa Tokumaru <sup>1,4</sup>, Li Yan <sup>5</sup>, Ryusei Matsuyama <sup>2</sup>, Itaru Endo <sup>2</sup>, Masayuki Nagahashi <sup>6</sup> and Kazuaki Takabe <sup>1,2,3,6,7,8,\*</sup>

- <sup>1</sup> Breast Surgery, Department of Surgical Oncology, Roswell Park Comprehensive Cancer Center, Buffalo, New York, NY 14263, USA; masa1101oshi@gmail.com (M.O.); sneman5@buffalo.edu (S.N.); Yoshihisa.Tokumaru@roswellpark.org (Y.T.); kazuaki.takabe@roswellpark.org (K.T.)
- <sup>2</sup> Department of Gastroenterological Surgery, Yokohama City University Graduate School of Medicine, Yokohama 236-0004, Japan. ryusei@yokohama-cu.ac.jp (R.M.); endoit@med.yokohama-cu.ac.jp (I.E.)
- <sup>3</sup> Department of Surgery, Jacobs School of Medicine and Biomedical Sciences, State University of New York, Buffalo, New York, NY 14263, USA.
- <sup>4</sup> Department of Surgical Oncology, Graduate School of Medicine, Gifu University, 1-1 Yanagido, Gifu 501-1194, Japan
- <sup>5</sup> Department of Biostatistics & Bioinformatics, Roswell Park Comprehensive Cancer Center, Buffalo, New York, NY 14263, USA; li.yan@roswellpark.org
- <sup>6</sup> Division of Digestive and General Surgery, Niigata University Graduate School of Medical and Dental Sciences, Niigata 951-8520, Japan; masanagahashi@gmail.com
- <sup>7</sup> Department of Breast Surgery, Fukushima Medical University School of Medicine, Fukushima 960-1295, Japan.
- <sup>8</sup> Department of Breast Surgery and Oncology, Tokyo Medical University, Tokyo 160-8402, Japan.
- \* Correspondence: kazuaki.takabe@roswellpark.org; Tel.: +1-716-8455540; Fax: +1-716-8451668

Received: 15 July 2020; Accepted: date; Published: date

## Content

Table S1: Member genes of the Angiogenesis pathway score.

Figure S1: Histogram of angiogenesis score patient distribution in TCGA and METABRIC cohorts.

Figure S2: Association between the angiogenesis pathway score and survival of breast cancer patients in METABRIC cohort.

**Table 1.** Genes included in the Molecular Signatures Database (MSigDb) Hallmark angiogenesis gene set.

| <i>Gene Symbol</i> | <i>Gene Name</i>                                           |
|--------------------|------------------------------------------------------------|
| APOH               | Apolipoprotein H                                           |
| APP                | Amyloid Beta Precursor Protein                             |
| CCND2              | Cyclin D2                                                  |
| COL3A1             | Collagen Type III Alpha 1 Chain                            |
| COL5A2             | Collagen Type V Alpha 2 Chain                              |
| CXCL6              | C-X-C Motif Chemokine Ligand 6                             |
| FGFR1              | Fibroblast Growth Factor Receptor 1                        |
| FSTL1              | Follistatin Like 1                                         |
| ITGAV              | Integrin Subunit Alpha V                                   |
| JAG1               | Jagged1                                                    |
| JAG2               | Jagged2                                                    |
| KCNJ8              | Potassium Inwardly Rectifying Channel Subfamily J Member 8 |
| LPL                | Lipoprotein Lipase                                         |
| LRPAP1             | LDL Receptor Related Protein Associated Protein 1          |
| LUM                | Lumican                                                    |
| MSX1               | Msh Homeobox 1                                             |
| NRP1               | Neuropilin 1                                               |
| OLR1               | Oxidized Low Density Lipoprotein Receptor 1                |

|          |                                                            |
|----------|------------------------------------------------------------|
| PDGFA    | Platelet Derived Growth Factor Subnit B                    |
| PF4      | Platelet Factor4                                           |
| PGLYRP1  | Peptidoglycan Recognition Protein 1                        |
| POSTN    | Periostin                                                  |
| PRG2     | Proteoglycan 2                                             |
| PTK2     | Protein Tyrosine Kinase 2                                  |
| S100A4   | S100 Calcium Binding Protein A4                            |
| SERPINA5 | Serpin Family A Member 5                                   |
| SLCO2A1  | Solute Carrier Organic Anion Transporter Family Member 2A1 |
| SPP1     | Secreted Phosphoprotein 1                                  |
| STC1     | Stanniocalcin-1                                            |
| THBD     | Thrombomodulin                                             |
| TIMP1    | TIMP Metallopeptidase inhibitor 1                          |
| TNFRSF21 | Tumor Necrosis Factor Receptor Superfamily Member 21       |
| VAV2     | Vav Guanine Nucleotide Exchange Factor 2                   |
| VCAN     | Versican                                                   |
| VEGFA    | Vascular Endothelial Growth Factor A                       |
| VTN      | Vitronectin                                                |

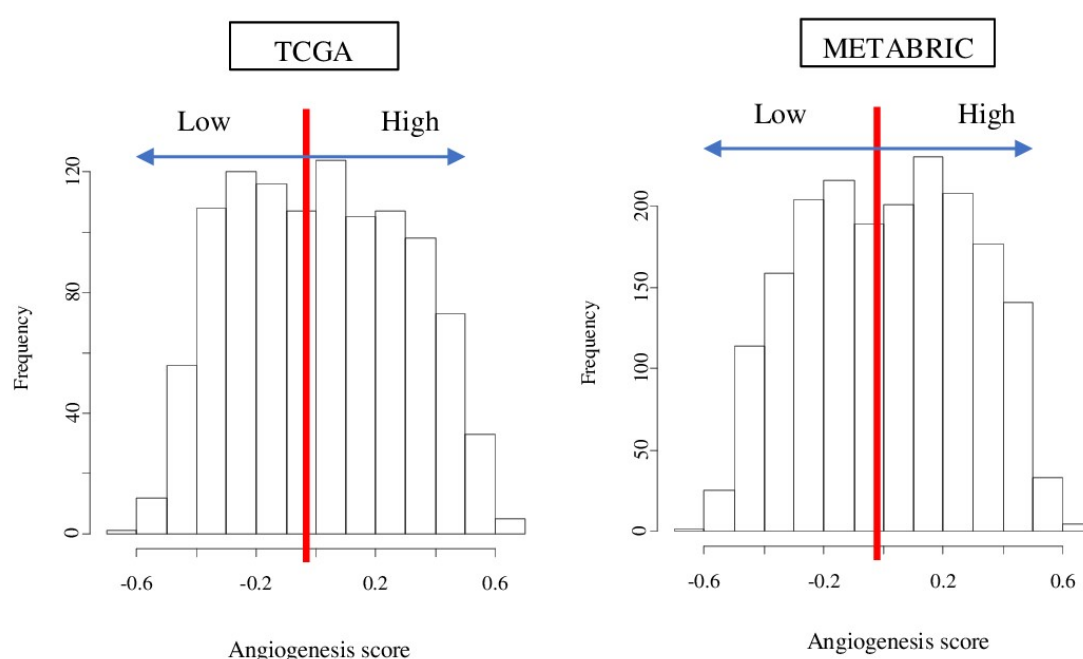

**Figure 1.** Histogram of angiogenesis score patient distribution in TCGA and METABRIC cohorts. Both cohorts demonstrate two weak peaks. Both cohorts were divided into High and Low score groups by the median value of the score (red line).

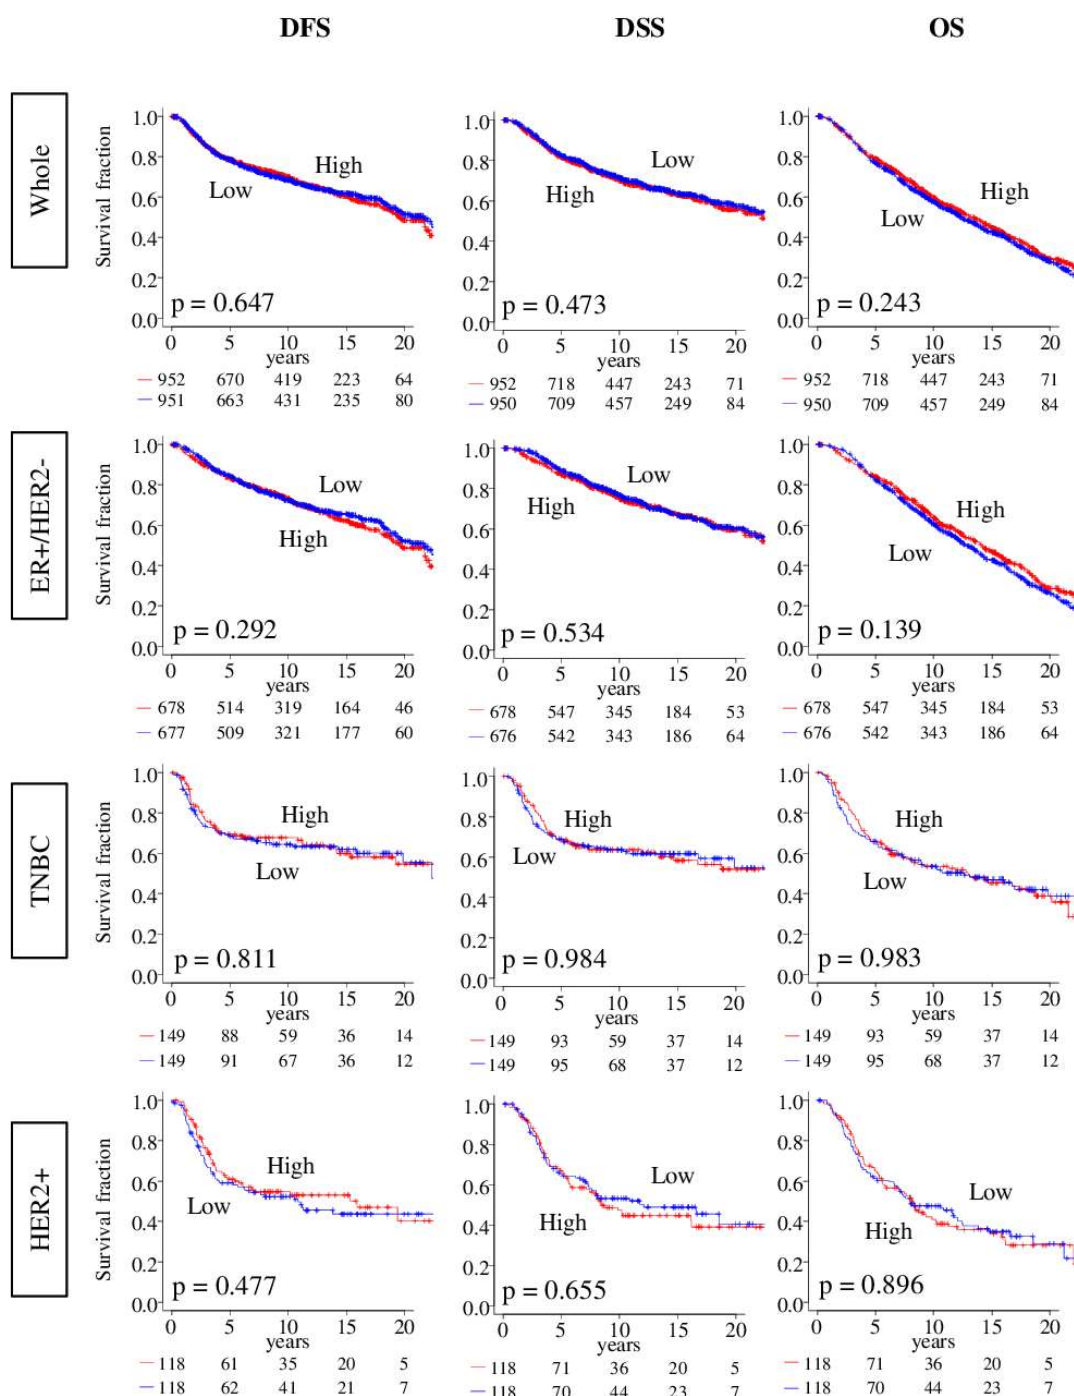

**Figure 2.** Association between the angiogenesis pathway score and survival of breast cancer patients in METABRIC cohort.
